# Supplementary material
Source: publisher site journal article supplement (https://www.dovepress.com/article/265036)
Supplement: Supplementary file 1 [file get_supplementary_file.php]

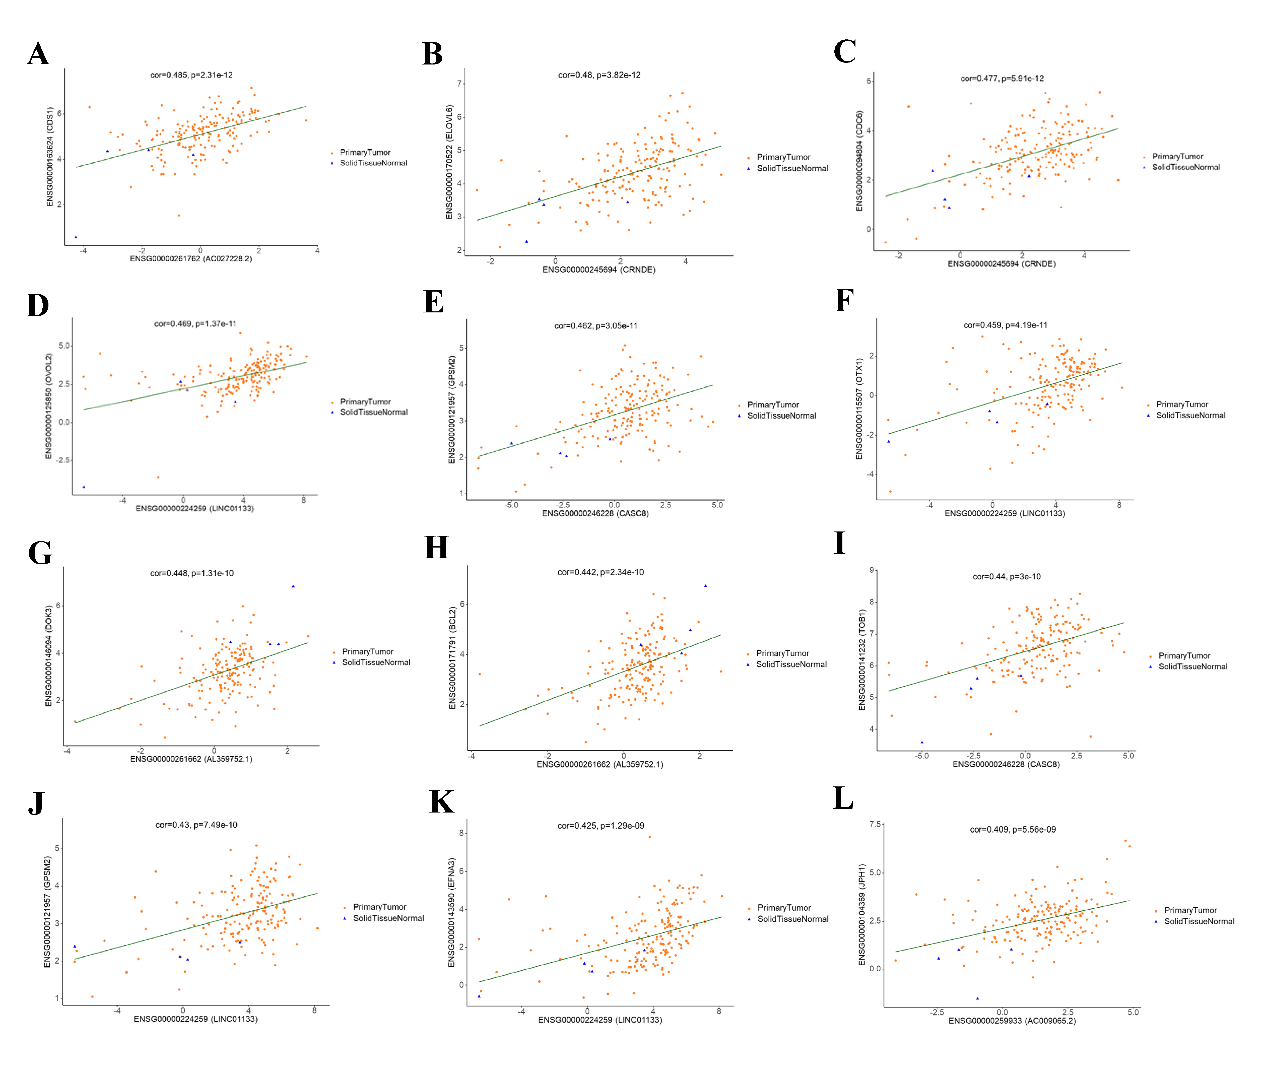


**Supplement Figure 1** Pearson's correlation analysis on the correlation between the expression level of lncRNAs and mRNAs. The “cor” indicated correlation coefficient in this figure.
